# Supplementary material for: DNA targeting by subtype I-D CRISPR–Cas shows type I and type III features
Source: PubMed Central journal article supplement — Nucleic Acids Res. 2020 Sep 22;48(18):10470–8. doi: 10.1093/nar/gkaa749 (PMC7544194; doi:10.1093/nar/gkaa749), 2020-09-22
Supplement: gkaa749_supplemental_file.pdf [file gkaa749_supplemental_file.pdf]

## **Supplementary Information for**

### **DNA targeting by subtype I-D CRISPR-Cas shows type I and type III features**

Jinzhong Lin, Anders Fuglsang, Anders Lynge Kjeldsen, Kaiyan Sun, Yuvaraj Bhoobalan-Chitty & Xu  
Peng\*

\*Corresponding author. Email: peng@bio.ku.dk.

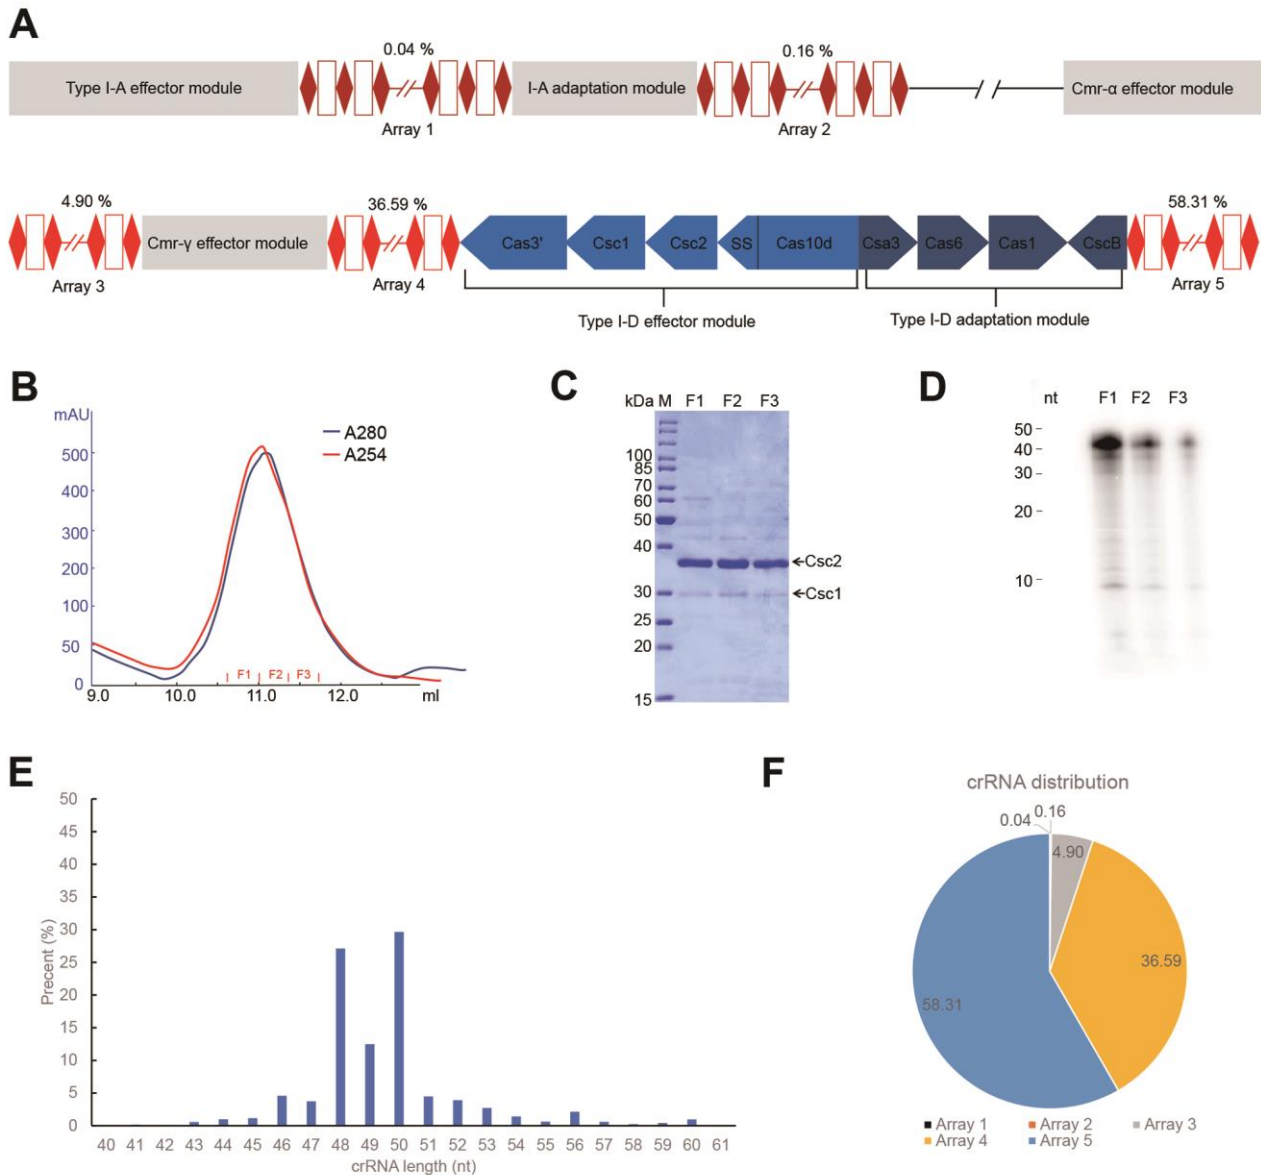

**Figure S1.** crRNA content of the endogenous backbone complex. **(A)** Overview of the CRISPR-Cas systems in *S. islandicus* LAL14/1. The proportion of crRNA (%) present in type I-D backbone complex is indicated for each array. **(B)** Size exclusion chromatography (SEC) purification of type I-D backbone, blue: UV absorbance at 280 nm; red: UV absorbance at 254 nm. **(C)** SDS-PAGE of SEC samples collected in the peak region in (B). M: protein mass marker. **(D)** Denaturing gel electrophoresis of 5'-labelled crRNAs from SEC samples collected in the peak region in (B). **(E)** Size-distribution of the type I-D crRNAs. **(F)** Distribution of the type I-D crRNAs over the 5 CRISPR arrays, see details in **Figure S2**.

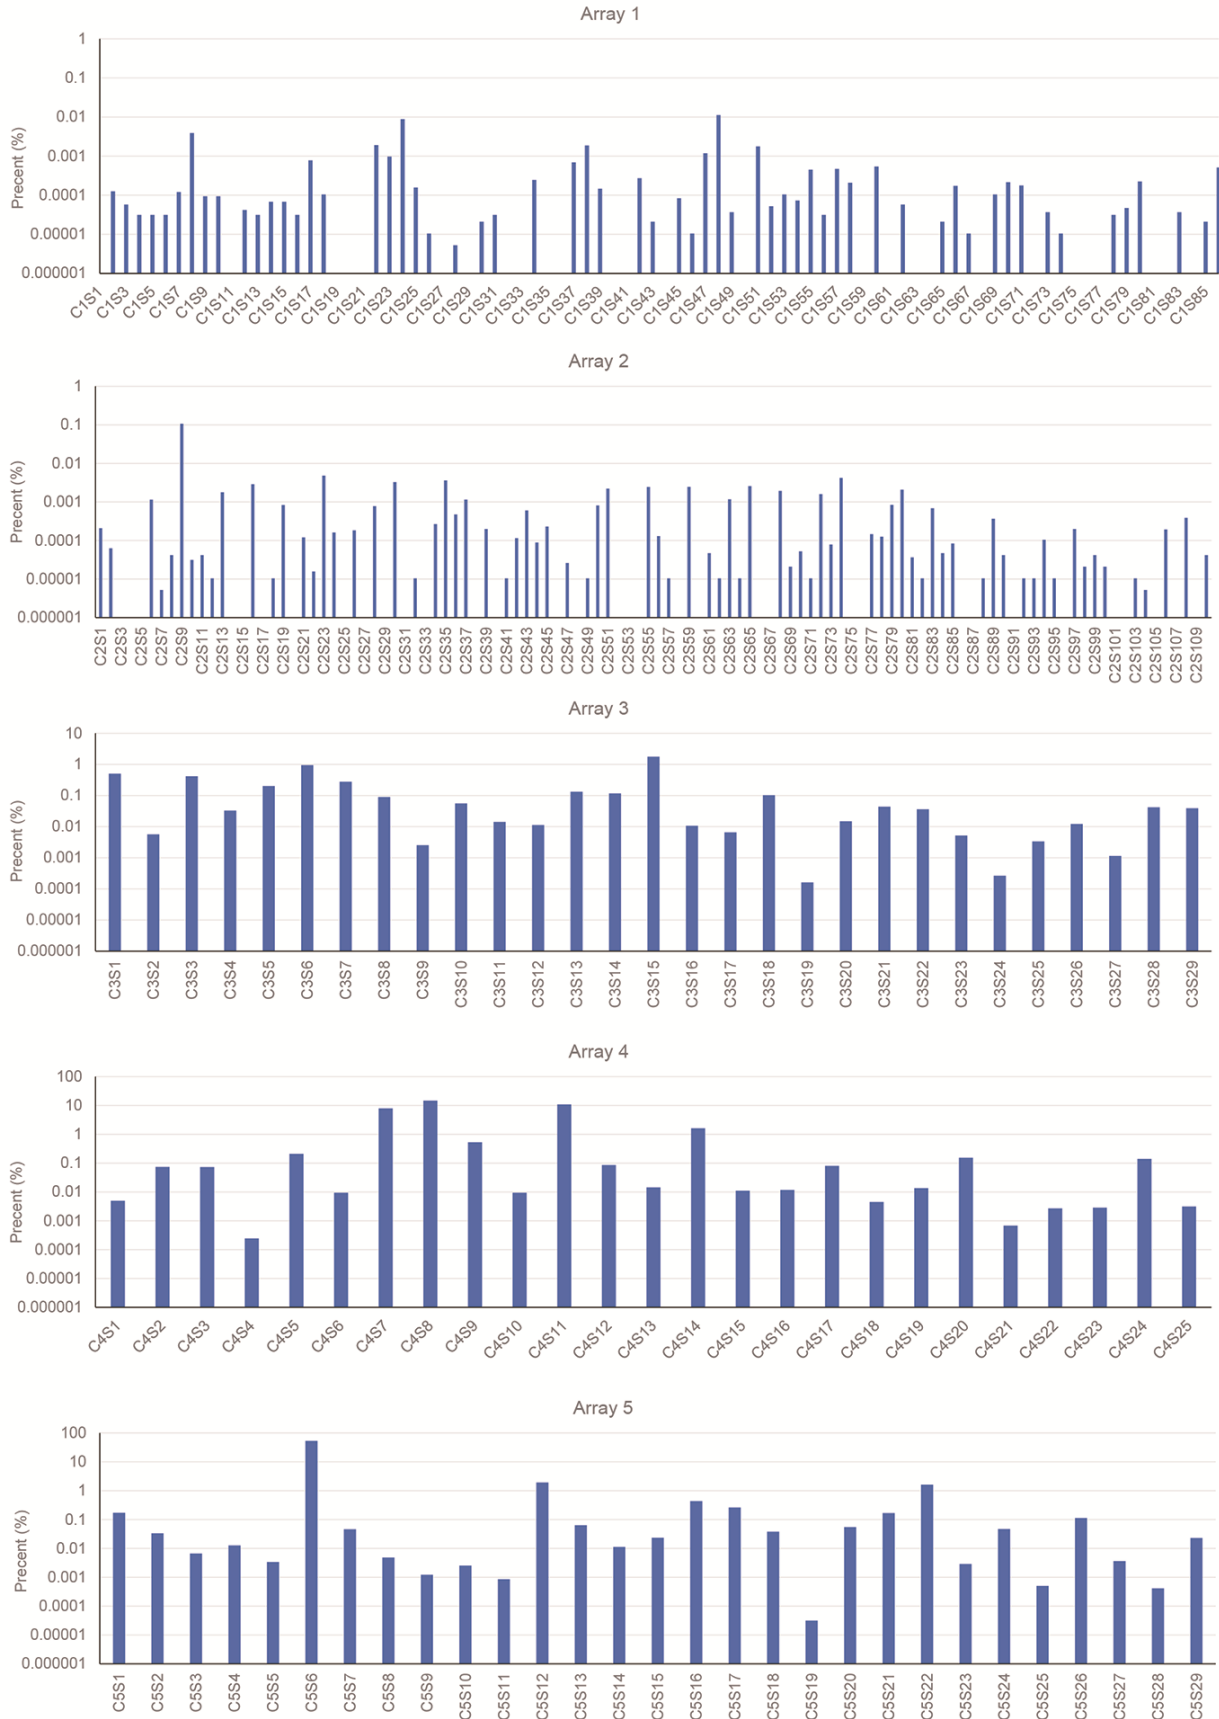

**Figure S2.** Distribution of the type I-D crRNAs over the 5 CRISPR arrays in detail. CxSy: spacer y in CRISPR array x.

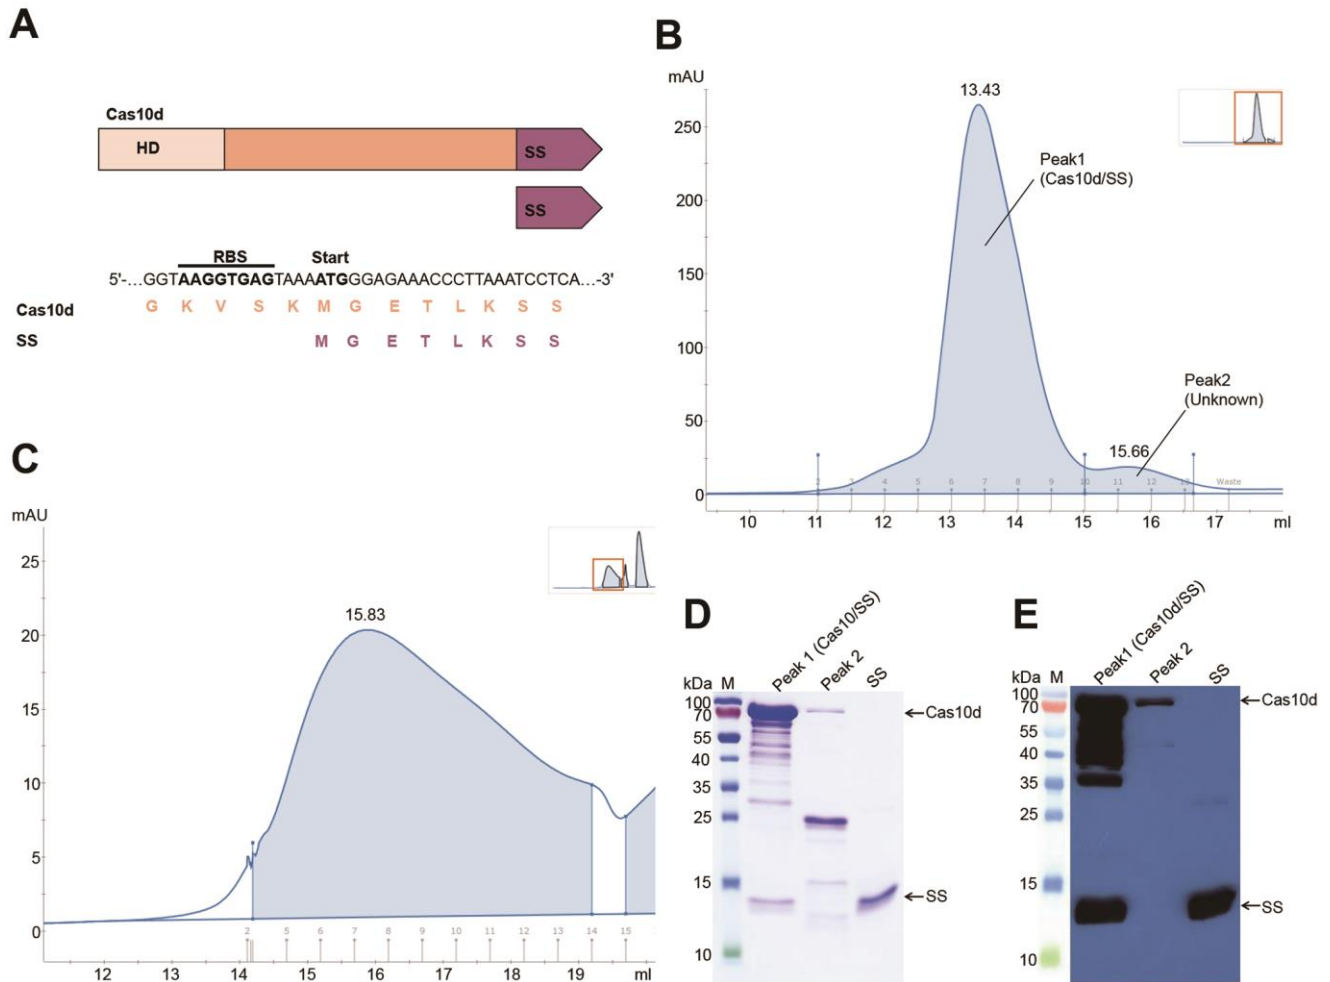

**Figure S3.** Predicted small subunit is expressed from an internal translational start codon in cas10d. **(A)** Schematic presentation of Cas10d showing the HD domain and the predicted C-terminal small subunit (SS). The DNA sequence around the internal start codon ATG is shown and the upstream ribosome-binding site is indicated. Amino acid sequences for this region are also shown for both Cas10d and SS. **(B)** Size exclusion chromatography (SEC) purification of Cas10d/SS from *E. coli*. Nickel-His tag affinity purified proteins were subjected to SEC and the SEC chromatogram is shown, The complete chromatogram is included in a small scale on top. Peak 1 (elution volume 13.4 ml) contained Cas10d and SS whereas peak 2 (elution volume 15.6 ml) contained unidentified proteins but no SS (see panels **(D)** and **(E)**). **(C)** SEC purification of SS with a C-terminal His-tag from *E. coli*. SS with a C-His tag was expressed in and purified from *E. coli* separately to examine the SEC elution volume of a free SS. The free SS was eluted in approximately 15.8 ml, but not in 13.43 ml (panel **(B)**), indicating SS must interact with Cas10d (see panel **(B)**). SDS-PAGE **(D)** and Western blotting **(E)** of proteins from peaks 1 and 2 (panel **(B)**) as well as the free SS (panel **(C)**). M: protein mass marker. An anti-His-tag antibody was used in **(E)**. In contrast to Cas10d used in the cleavage assays (**Figure 1B**), Cas10d prepared in this experiment exhibited significant degradation.

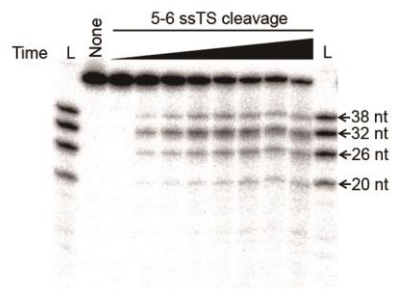

**Figure S4.** Time course of ssDNA cleavage by type I-D effector. Cleavage products were collected at 0, 20, 40, 60, 80, 100, 120 and 150 min. None: No effector complex was added, L: ssDNA size marker with lengths in nt indicated.

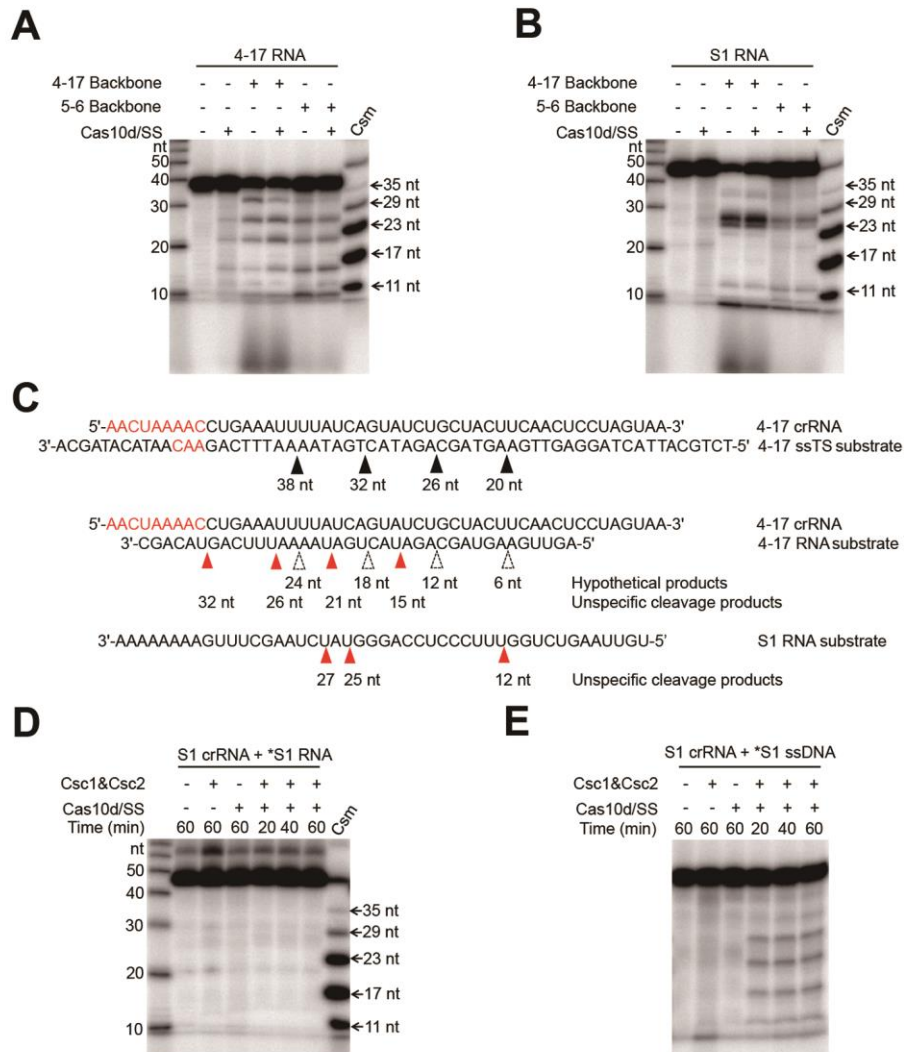

**Figure S5.** No specific RNA cleavage by type I-D effector. **(A)** and **(B)** Unspecific RNA cleavage by contaminating RNase present in type I-D components. The radiolabelled RNA targets are shown on top of each gel under which the presence (+) or absence (-) of the type I-D components is indicated. S1 RNA cleavage products cleaved by *Lactobacillus delbrueckii* Type III Csm (1) carrying S1 crRNA are shown in both panels as control. The sizes of S1 cleavage products by Csm are depicted on the right side of each gel. Nearly identical cleavage patterns on the same RNA (4-17 RNA) observed for the I-D effectors carrying different crRNAs (4-17 and 5-6 crRNAs) indicate the cleavage is unspecific **(A)**. **(C)** Schematic depiction of the cleavage sites on RNA substrates. Hypothetical cleavage sites for a putative specific RNA cleavage are indicated by empty triangles and the observed cleavage site are shown by red triangles. Specific ssDNA cleavage sites (dark triangles) are presented as reference. Both backbone samples purified from *Sulfolobus* showed cleavage between UA and UG (3'-5'), likely due to a contaminating RNase present in these samples. RNA cleavage **(D)** and ssDNA cleavage **(E)** by type I-D effector. Radiolabelled S1 RNA and S1 ssDNA were used and indicated on top. Reactions were performed using Csc1 and Csc2 complex purified from *E. coli* and a purchased S1 crRNA, in the presence (+) or absence (-) of Cas10d/SS.

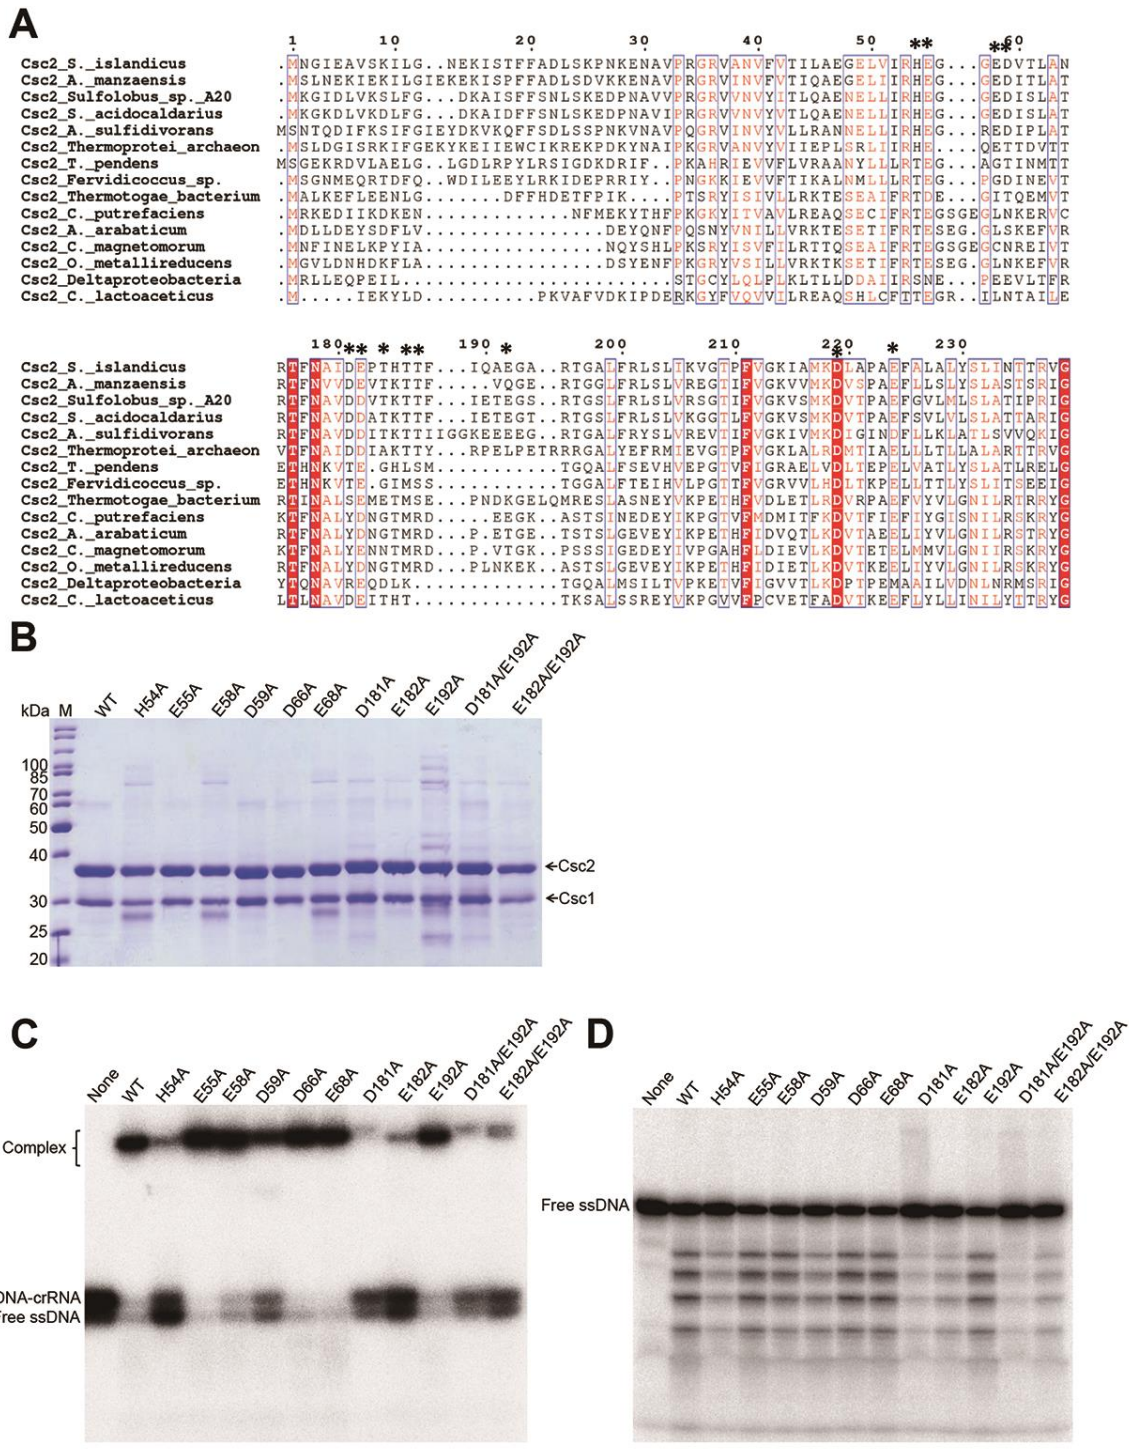

**Figure S6.** Effect of Csc2 mutations on ssDNA binding, ssDNA and dsDNA cleavage by type I-D effector. **(A)** Conserved residues in Csc2 subunit. Fourteen *Sulfolobus islandicus* Csc2 homologues from: *Acidianus manzaensis*, *Sulfolobus* sp. A20, *Sulfolobus acidocaldarius*, *Acidianus sulfidivorans*, *Thermoprotei archaeon*, *Thermofilum pendens*, *Fervidicoccus* sp., *Thermotogae bacterium*, *Clostridium putrefaciens*, *Acetohalobium arabaticum*, *Candidatus Magnetomorum*, *Orenia metallireducens*, *Deltaproteobacteria bacterium* and *Caldicellulosiruptor lactoaceticus* were selected and aligned using MEGA5 (2) and visualized using ESPript 3 (3). Residues marked with stars were

mutated individually to produce the Csc2 mutants. **(B)** SDS-PAGE of Csc1 and Csc2 (WT and mutants) complex purified from *E. coli*. M: protein mass marker. ssDNA binding **(C)** and ssDNA cleavage **(D)** by type I-D effectors carrying the WT or mutated Csc2 as indicated on top. None: No effector complex was added.



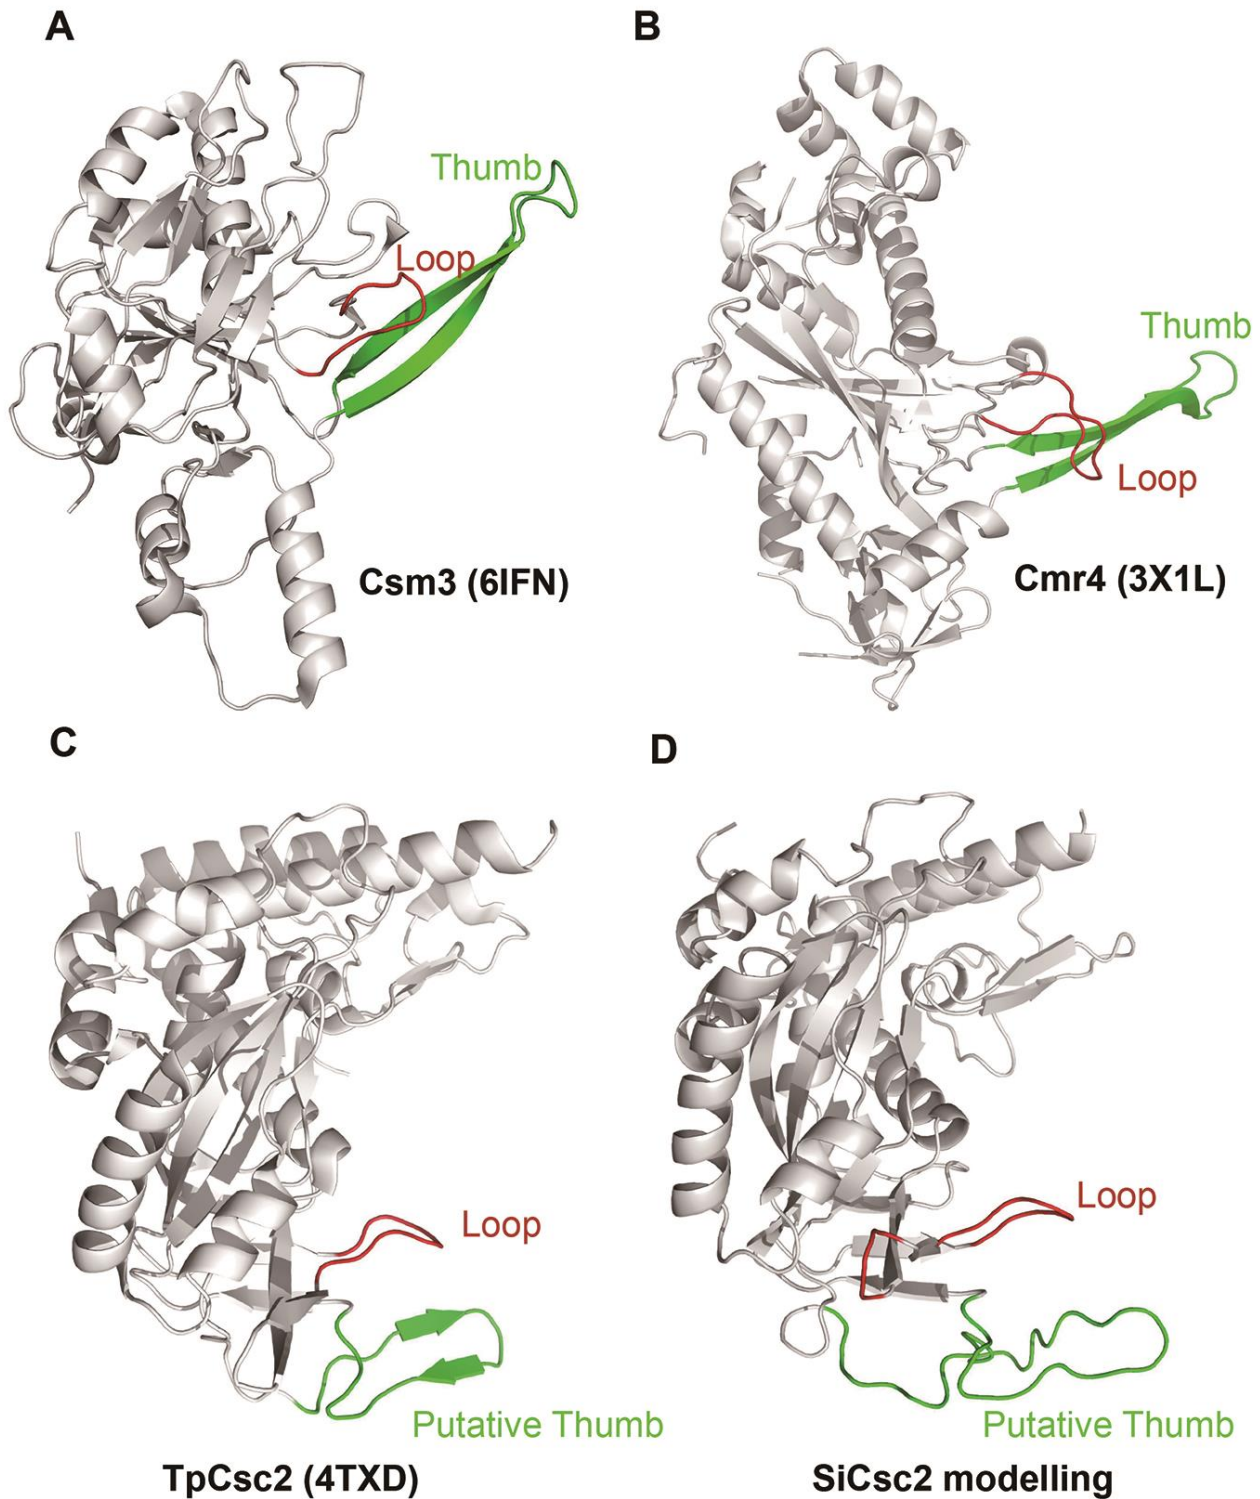

**Figure S7.** *S. islandicus* LAL14/1 Csc2 (SiCsc2) structure modelling. **(A)**, **(B)** and **(C)** Structures of *Streptococcus thermophilus* Csm3 (4), *Pyrococcus furiosus* Cmr4 (5), and *Thermofilum pendens* Csc2 (6), respectively. **(D)** Structural model of SiCsc2 made by I-TASSER (7) using the solved structure of *T. pendens* Csc2 as reference. Loop and thumb are indicated in each structure.

**Table S1 Nucleic acid oligos and substrates used in this study.**

| ssDNA and RNA oligos | Sequence (5'-3')                                          | Description                                |
|----------------------|-----------------------------------------------------------|--------------------------------------------|
| NdeI-Csc1-F          | TAAGAAGGAGAGCACATATGAAGTTGTATAAG<br>GCAAATTTTTAC          | For plasmid pEXA2-Csc1 construction        |
| NheI-His-Csc1-R      | CTAGGCTAGCTTAATGGTGGTGATGATGATGT<br>TTCTTTTCCTCGCTTTGCC   | For plasmid pEXA2-Csc1 construction        |
| Re-5-6-F             | GTAACAACACAAAGAACTAAAACGAAATTTG<br>GAAAGTAGGAGAAAAGAACAA  | For plasmid pEXA2-Csc1-5-6 construction    |
| Re-5-6-R             | GTTTTAGTTTCTTTGTGTTGTTACTATCTATAG<br>ATTGTTCTTTTCTCCTACTT | For plasmid pEXA2-Csc1-5-6 construction    |
| Re-4-17-F            | GTAACAACACAAAGAACTAAAACCTGAAATT<br>TTATCAGTATCTGCTACTTCA  | For plasmid pEXA2-Csc1-4-17 construction   |
| Re-4-17-R            | GTTTTAGTTTCTTTGTGTTGTTACTTACTAGGA<br>GTTGAAGTAGCAGATACTGA | For plasmid pEXA2-Csc1-4-17 construction   |
| Csc1-F               | TAAGAAGGAGAGCACATATGAAGTTGTATAAG<br>GCAAATTTTTAC          | For plasmid pETDuet-Csc1-Csc2 construction |
| His-Csc1-R           | TTAATGGTGGTGATGATGATGTTTCTTTTCCT<br>CGCTTTGCC             | For plasmid pETDuet-Csc1-Csc2 construction |
| Csc2-F               | ATAAGAAGGAGATATACATATGAATGGGATTG<br>AAGCAGTCTC            | For plasmid pETDuet-Csc1-Csc2 construction |
| Csc2-R               | GTTTCTTTACCAGACTCGAGTCACTTTTAAATG<br>AATTCCTCT            | For plasmid pETDuet-Csc1-Csc2 construction |
| Cas3'-F              | GAGAACCTCTACTTCCAATCGATGCCTTCCAA<br>TAAATTGGC             | For plasmid pMAL-TEV-Cas3' construction    |

|               |                                                         |                                             |
|---------------|---------------------------------------------------------|---------------------------------------------|
| Cas3'-R       | TTAATGGTGGTGATGATGATGTATAAATAATG<br>CTAAACCTATTAC       | For plasmid pMAL-TEV-<br>Cas3' construction |
| 5-6-F         | AGGAAAAAATTAACAAAACCTACAAATTATGCA<br>GACTGTGGAAATTTGGAA | For 5-6 dsDNA SOE-PCR                       |
| 5-6-R1        | TTGAATATCTATAGATTGTTCTTTTCTCCTACT<br>TTCCAAATTTCCACAGT  | For 5-6 dsDNA SOE-PCR                       |
| 5-6-R         | TGTAAATCTATATCTAAAGCTTGTA AAACTATT<br>TGAATATCTATAGATTG | For 5-6 dsDNA SOE-PCR                       |
| 5-6 NTS-F     | AGGAAAAAATTAACAAAAC                                     | For 5-6 dsDNA substrate<br>production       |
| 5-6 TS-F      | TGTAAATCTATATCTAAAG                                     | For 5-6 dsDNA substrate<br>production       |
| Cas10d-HD-A-F | CCAAGCGGCGAGAAACCCCGTAAAACC                             | For Cas10d HD-A mutation                    |
| Cas10d-HD-A-R | TTTCTCGCCGCTTGG AATAAATTGAGTGGAAA<br>AGAGGAGTC          | For Cas10d HD-A mutation                    |
| Csc2-H54A-F   | TAATAAGAGCTGAAGGAGGAGAGGACGTA                           | For Csc2 H54A mutation                      |
| Csc2-H54A-R   | CCTCCTTCAGCTCTTATTACCAGTTCTCCTTC                        | For Csc2 H54A mutation                      |
| Csc2-E55A-F   | TAAGACATGCAGGAGGAGAGGACGTA ACTTT<br>AG                  | For Csc2 E55A mutation                      |
| Csc2-E55A-R   | CTCTCCTCCTGCATGTCTTATTACCAGTTCTC                        | For Csc2 E55A mutation                      |
| Csc2-E58A-F   | AAGGAGGAGCGGACGTA ACTTTAGCAAACA                         | For Csc2 E58A mutation                      |
| Csc2-E58A-R   | GTTACGTCCGCTCCTCCTTCATGTCTTATTAC                        | For Csc2 E58A mutation                      |
| Csc2-D59A-F   | GGAGGAGAGGCCGTA ACTTTAGCAAACATTG                        | For Csc2 D59A mutation                      |
| Csc2-D59A-R   | AAAGTTACGGCCTCCTCCTTCATGTCTTA                           | For Csc2 D59A mutation                      |
| Csc2-D66A-F   | CAAACATTGCCGAGAAAATACCCAATGAT                           | For Csc2 D66A mutation                      |
| Csc2-D66A-R   | TTTTCTCCGGCAATGTTTGCTAAAGTTACG                          | For Csc2 D6655A mutation                    |
| Csc2-E68A-F   | TTGACGGAGCAA AATACCCAATGATATTGCAC                       | For Csc2 E68A mutation                      |

|                    |                                         |                               |
|--------------------|-----------------------------------------|-------------------------------|
| Csc2-E68A-R        | GGGTATTTTGCTCCGTCATGTTTGCTAAAG          | For Csc2 E68A mutation        |
| Csc2-D181A-F       | ACGCAATTGCTGAACCTACGCATACTACC           | For Csc2 D181A mutation       |
| Csc2-D181A-R       | GTAGGTTTCAGCAATTGCGTTAAATGTTCTC         | For Csc2 D181A mutation       |
| Csc2-E182A-F       | GCAATTGATGCACCTACGCATACTACCTTTA         | For Csc2 E182A mutation       |
| Csc2-E182A-R       | TGCGTAGGTGCATCAATTGCGTTAAATGTTTC        | For Csc2 E182A mutation       |
| Csc2-E192A-F       | TTCAAGCTGCGGGAGCTAGGACTGGTGAC           | For Csc2 E192A mutation       |
| Csc2-E192A-R       | CTAGCTCCCGCAGCTTGAATAAAGGTAGT           | For Csc2 E192A mutation       |
| Csc2-D181/E182A-F  | CGCAATTGCTGCACCTACGCATACTACCTTTA<br>TTC | For Csc2 D181A/E182A mutation |
| Csc2-D181/E182A-R  | CGTAGGTGCAGCAATTGCGTTAAATGTTCTC         | For Csc2 D181/E182A mutation  |
| Csc2-D181N-F       | ACGCAATTAATGAACCTACGCATACTACC           | For Csc2 D181N mutation       |
| Csc2-D181N-R       | GTAGGTTTCATTAATTGCGTTAAATGTTCTCAC       | For Csc2 D181N mutation       |
| Csc2-T184A-F       | ATGAACCTGCGCATACTACCTTTATTCAAG          | For Csc2 T184A mutation       |
| Csc2-T184A-R       | GTAGTATGCGCAGGTTTCATCAATTGCGTTAA        | For Csc2 T184A mutation       |
| Csc2-T186/T187A-F  | TACGCATGCTGCCTTTATTCAAGCTGAGGGA<br>GC   | For Csc2 T186/T187A mutation  |
| Csc2-T186/T187A-R  | GAATAAAGGCAGCATGCGTAGGTTTCATCAATT<br>G  | For Csc2 T186/T187A mutation  |
| Csc2-E182Q-F       | CAATTGATCAACCTACGCATACTACCTTTA          | For Csc2 E182Q mutation       |
| Csc2-E182Q-R       | TGCGTAGGTTGATCAATTGCGTTAAATGTTTC        | For Csc2 E182Q mutation       |
| Csc2-D181N/E182Q-F | CGCAATTAATCAACCTACGCATACTACCTTTA        | For Csc2 D181N/E182Q mutation |
| Csc2-D181N/E182Q-R | GCGTAGGTTGATTAATTGCGTTAAATGTTCTC<br>AC  | For Csc2 D181N/E182Q mutation |

| <b>Nucleic acid substrates</b>  |                                                                                                                                   |                                                |
|---------------------------------|-----------------------------------------------------------------------------------------------------------------------------------|------------------------------------------------|
| 5-6 ssTS <sub>CAC</sub>         | ATTTGAATATCTATAGATTGTTCTTTTCTCCTA<br>CTTTCCAAATTTCCACAGTCTGCATAA                                                                  | 5-6 ssDNA sequence with<br>CAC in PAM position |
| 5-6 ssTS <sub>TTT</sub>         | ATTTGAATATCTATAGATTGTTCTTTTCTCCTA<br>CTTTCCAAATTTCTTTAGTCTGCATAA                                                                  | 5-6 ssDNA sequence with<br>TTT in PAM position |
| 4-17 ssTS                       | TCTGCATTACTAGGAGTTGAAGTAGCAGATAC<br>TGATAAAATTTT CAGAACAATACATAGCA                                                                | 4-17 ssDNA sequence                            |
| 5-6 dsDNA <sub>GTG</sub><br>NTS | AGGAAAAAATTAACAAAAC TACAAATTATGCA<br>GACTGTGGAAATTTGGAAAGTAGGAGAAAAG<br>AACAACTCTATAGATATTCAAATAGTTTTACAAG<br>CTTTAGATATAGATTTACA | 5-6 dsDNA NTS sequence<br>with GTG PAM         |
| 5-6 dsDNA <sub>AAA</sub><br>NTS | AGGAAAAAATTAACAAAAC TACAAATTATGCA<br>GACTAAAGAAATTTGGAAAGTAGGAGAAAAGA<br>ACAATCTATAGATATTCAAATAGTTTTACAAGC<br>TTTAGATATAGATTTACA  | 5-6 dsDNA NTS sequence<br>with AAA PAM         |
| 5-6 crRNA                       | AACUAAAACGAAAUUUGGAAAGUAGGAGAAA<br>AGAACAUCUAUAGAU                                                                                | 5-6 crRNA sequence                             |
| 4-17 RNA                        | AGUUGAAGUAGCAGAUACUGAUAAA AUUCA<br>GUACAGC                                                                                        | 4-17 RNA target sequence                       |
| S1 crRNA                        | AACUAAAACUUCAAAGCUUAGAUACCCUGGA<br>GGGAAACCAGACUUAACA                                                                             | S1 crRNA sequence                              |
| S1 RNA                          | UGUUAAGUCUGGUUCCCUCCAGGGUAUCU<br>AAGCUUUGAAAAAAA                                                                                  | S1 RNA target sequence                         |
| S1 ssDNA                        | ATTTGAATGTTAAGTCTGGTTTCCCTCCAGGG<br>TATCTAAGCTTTGAACACAGTCTGCTAA                                                                  | S1 ssDNA target sequence                       |

## REFERENCES

1. Lin, J., Feng, M., Zhang, H. and She, Q. (2020) Characterization of a novel type III CRISPR-Cas effector provides new insights into the allosteric activation and suppression of the Cas10 DNase. *Cell Discov*, **6**, 29.
2. Tamura, K., Peterson, D., Peterson, N., Stecher, G., Nei, M. and Kumar, S. (2011) MEGA5: molecular evolutionary genetics analysis using maximum likelihood, evolutionary distance, and maximum parsimony methods. *Mol Biol Evol*, **28**, 2731-2739.
3. Robert, X. and Gouet, P. (2014) Deciphering key features in protein structures with the new ENDscript server. *Nucleic Acids Res.*, **42**, W320-324.
4. You, L., Ma, J., Wang, J., Artamonova, D., Wang, M., Liu, L., Xiang, H., Severinov, K., Zhang, X. and Wang, Y. (2019) Structure Studies of the CRISPR-Csm Complex Reveal Mechanism of Co-transcriptional Interference. *Cell*, **176**, 239-253 e216.
5. Osawa, T., Inanaga, H., Sato, C. and Numata, T. (2015) Crystal structure of the CRISPR-Cas RNA silencing Cmr complex bound to a target analog. *Molecular cell*, **58**, 418-430.
6. Hrle, A., Maier, L.K., Sharma, K., Ebert, J., Basquin, C., Urlaub, H., Marchfelder, A. and Conti, E. (2014) Structural analyses of the CRISPR protein Csc2 reveal the RNA-binding interface of the type I-D Cas7 family. *Rna Biol*, **11**, 1072-1082.
7. Yang, J. and Zhang, Y. (2015) I-TASSER server: new development for protein structure and function predictions. *Nucleic Acids Res.*, **43**, W174-181.
